# Supplementary material
Source: publisher figshare collection journal article supplement (https://acs.figshare.com/ndownloader/files/5318392)
Supplement: Supplementary file 1 [file 5318392]

## Supporting Information

### **Silver(I) Cage and Infinite Chain Stabilized by Bowl-Shaped Resorcin[4]arene Tetraethynide Ligands**

**Xue Han,<sup>[a]</sup> Shan-Shan Jin,<sup>[a]</sup> Jian-Fang Ma,<sup>\*[a]</sup> Jin Yang,<sup>[a]</sup> and Thomas C. W.  
Mak<sup>\*[b]</sup>**

<sup>[a]</sup>*Key Lab of Polyoxometalate Science, Department of Chemistry, Northeast Normal  
University, Changchun 130024, China*

<sup>[b]</sup>*Department of Chemistry and Center of Novel Functional Molecules, The Chinese  
University of Hong Kong, Shatin, New Territories, Hong Kong SAR, China*

\* Correspondence authors

E-mail: majf247@yahoo.com (J.-F. Ma)

Fax: +86-431-85098620 (J.-F. Ma)

E-mail: tcwmak@cuhk.edu.hk (T. C. W. Mak)

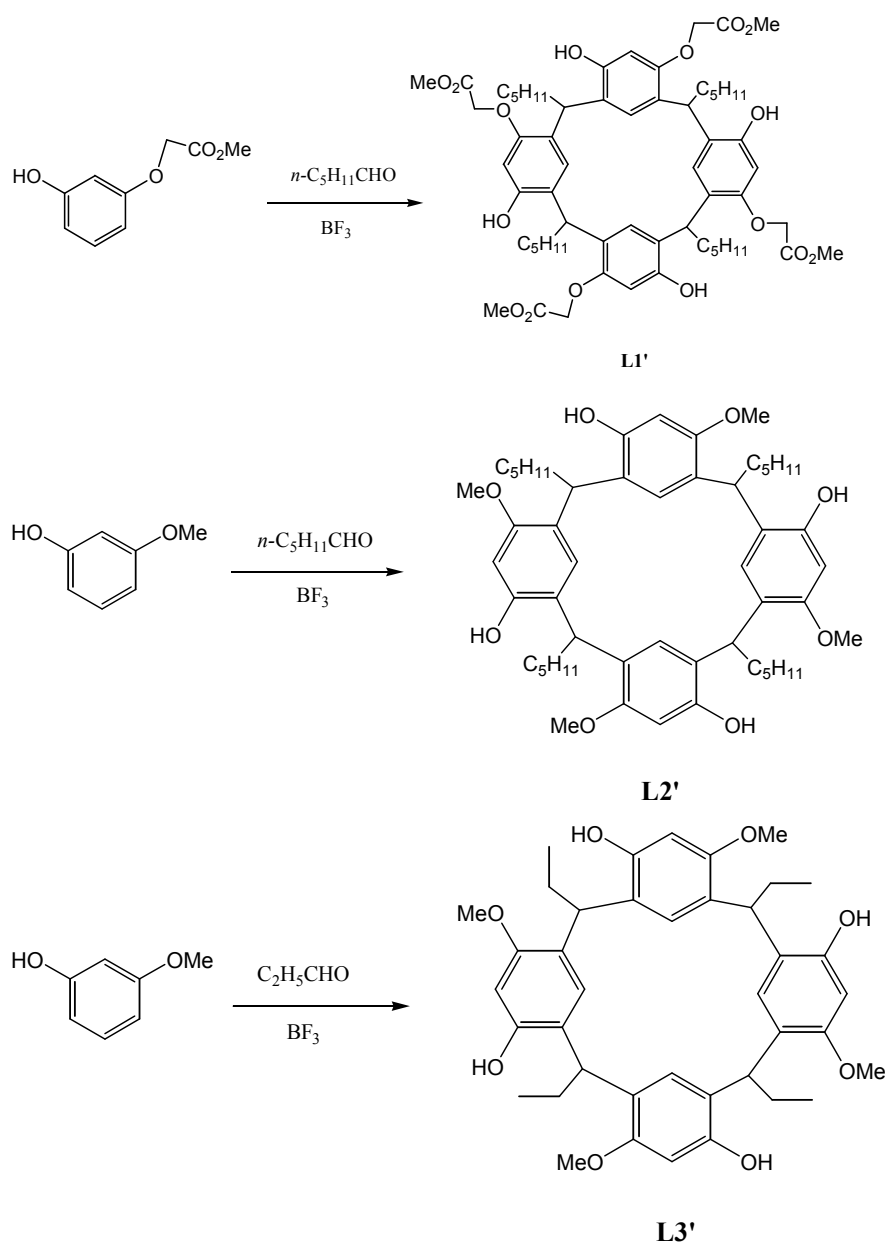

Scheme S1. Synthetic Procedure of L1', L2' and L3'.

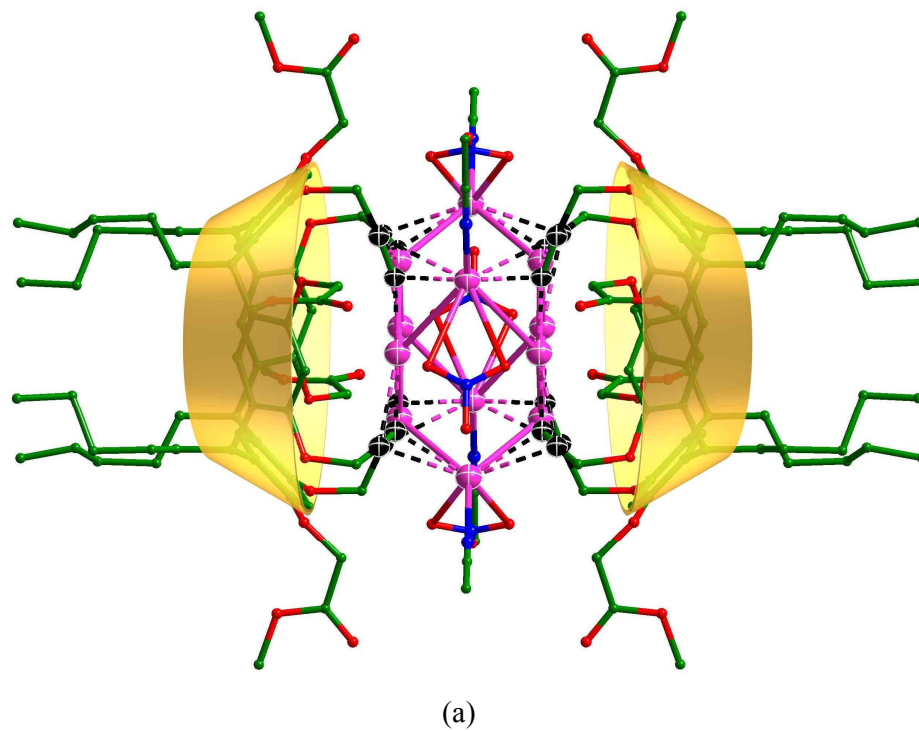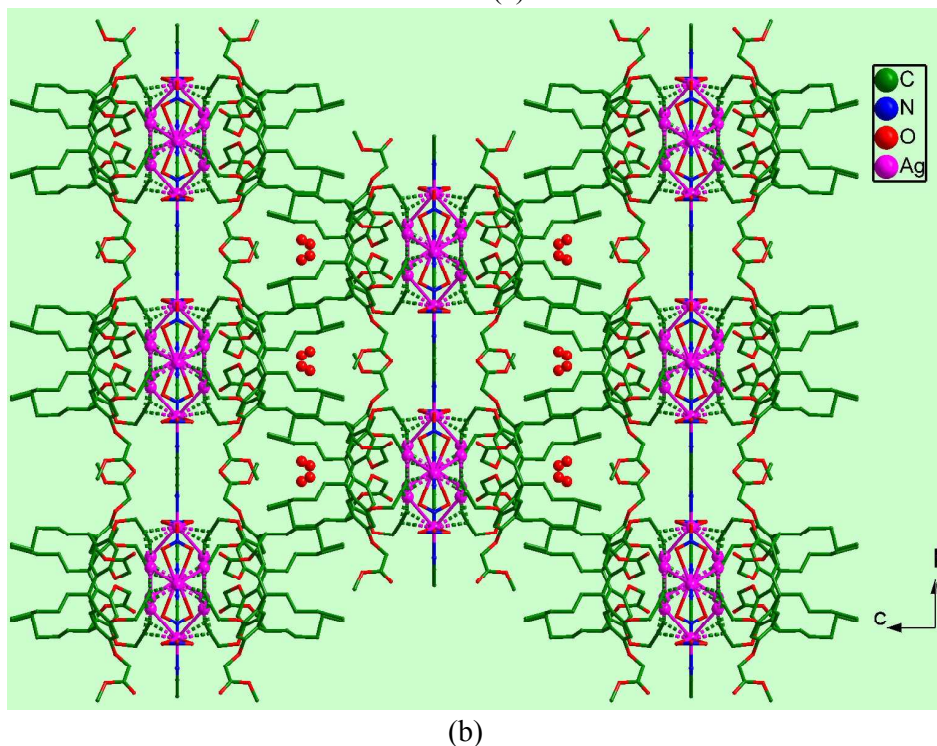

**Figure S1.** (a) Perspective view of the sandwich-type  $\text{Ag}_{12}$  cage embraced by two bowl-shaped resorcin[4]arene tetraethynide units in **1**. The coordinated nitrate and acetonitrile ligands are shown. The hydrogen atoms and lattice water molecules are omitted. (b) Perspective view of the packing structure of **1**. The disordered lattice

water molecules are shown as red balls.

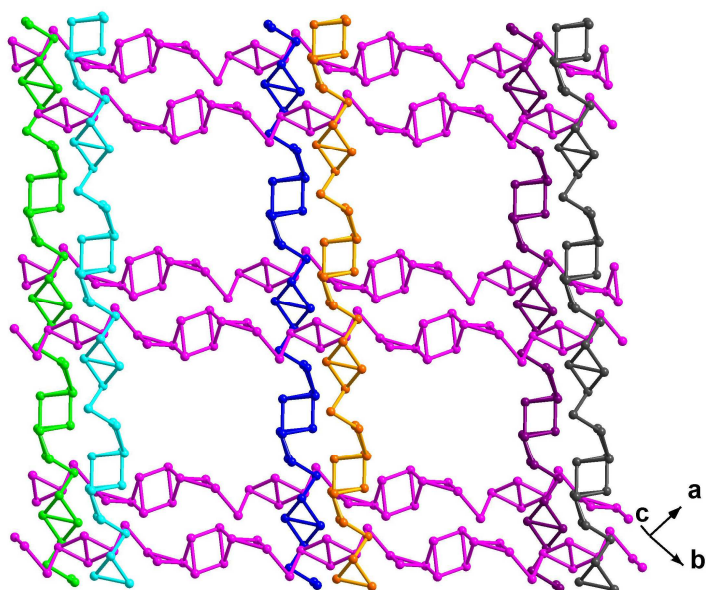

**Figure S2.** Intersected packing manner of adjacent silver(I) chains in **2**.

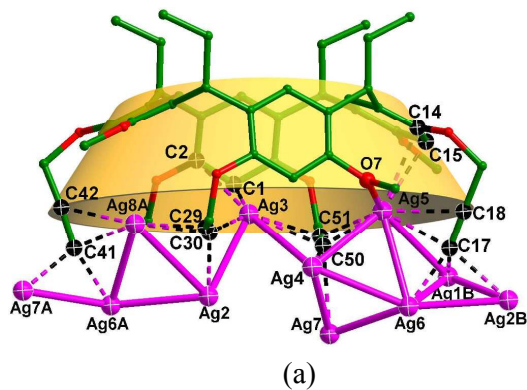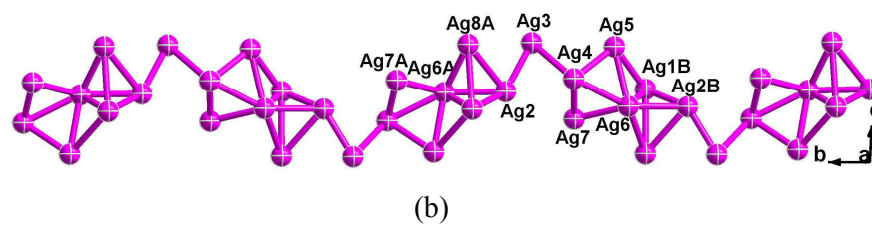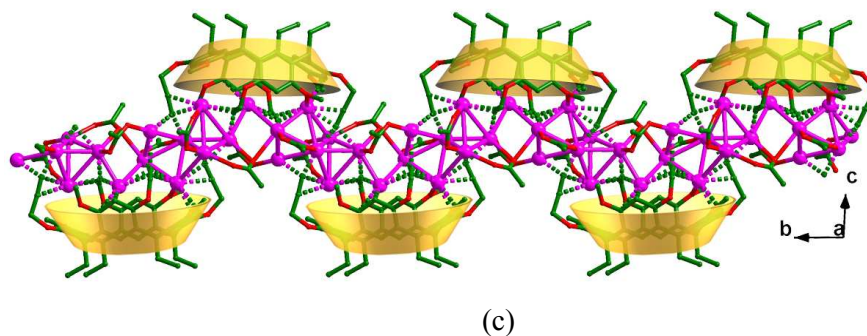

**Figure S3.** (a) Coordination modes of the ethynide groups on the  $L3^{4-}$  anion with atom labeling in **4**. (b) Characteristic cationic silver(I) chain formed from the linkage of adjacent  $Ag_{11}$  aggregates *via* argentophilic interactions. (c) Infinite zigzag silver(I) chain alternately decorated by the bowl-shaped resorcin[4]arene tetra-ethynide units *via*  $Ag \cdots C$  bonds. Hydrogen atoms, fluorine atoms and acetone molecules are omitted for clarity.

### Electrochemical properties

The electrochemical properties were also studied for **3**, **4** and  $AgCF_3CO_2$ . Cyclic voltammograms of **3** and **4** exhibit quasi-reversible redox couples  $E_c/E_a$  ( $E_c$  and  $E_a$  are cathodic and anodic peak potentials, respectively) of 350 mV/1100 mV and 250 mV/1000 mV, respectively. These peaks are very similar to the redox couples of  $AgCF_3CO_2$  ( $E_c/E_a$  of 200 mV/1200 mV) (Figure S4). Thereby, the redox peaks for **3** and **4** mainly account for the redox process of  $Ag^+/Ag$  couples. The different  $E_c$  and  $E_a$  values also demonstrate that the bulk ethynide functionalized resorcin[4]arene ligands probably play a role in affecting the redox behaviors. Controlled-potential electrolyses of **3** and **4** show a consumption of 8 electrons per molecule, respectively. These multi-electron transfer processes also hold promise for the generation of mixed-valent silver(0,I) materials by electroreduction of multinuclear silver(I)–alkynyl complexes.

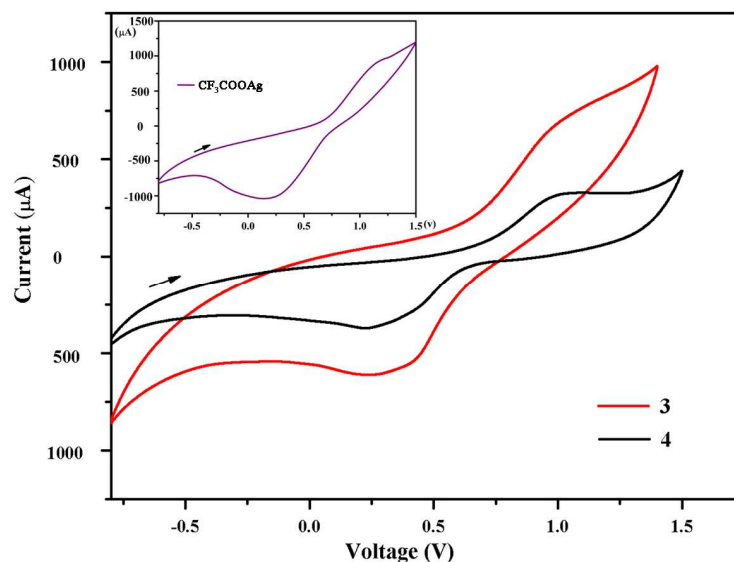

**Figure S4.** Cyclic voltammograms for **3**, **4** and AgCF<sub>3</sub>CO<sub>2</sub> in methanol solutions containing 1 mol/L LiClO<sub>4</sub> and 0.5 mol/L CF<sub>3</sub>COOH.

### Luminescence

The luminescent properties of H<sub>4</sub>L2 and complex **3** were studied in the solid state at room temperature. As shown in Figure S5, the main emission peak of the free H<sub>4</sub>L2 ligand is at 525 nm upon excitation at 370 nm, which is probably from the  $\pi^*\rightarrow\pi$  or  $\pi^*\rightarrow n$  transition. Complex **3** exhibits an emission peak at 526 nm upon excitation at 363 nm, which is very close to that of the free H<sub>4</sub>L2 ligand. Thereby, the emission of complex **3** is probably attributed to ligand-to-ligand charge transition.

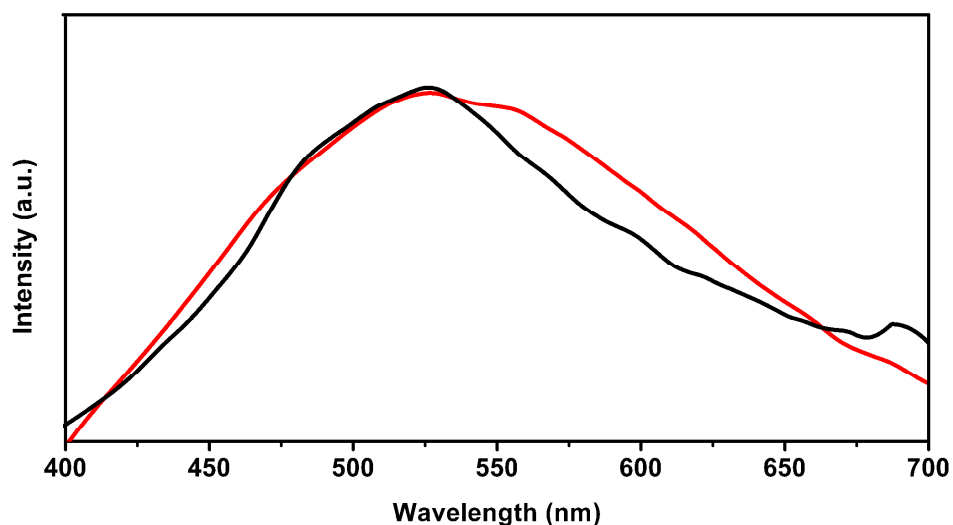

**Figure 5.** Solid state luminescence spectra of H<sub>4</sub>L2 (red) and complex **3** (black) at room temperature.
